# Supplementary material for: Comprehensive characterization of lncRNA-mRNA related ceRNA network across 12 major cancers
Source: Oncotarget. 2016 Aug 26;7(39):64148–67. doi: 10.18632/oncotarget.11637 (PMC5325432; doi:10.18632/oncotarget.11637)
Supplement: Supplementary file 1 [file oncotarget-07-64148-s001.pdf]

# Comprehensive characterization of lncRNA-mRNA related ceRNA network across 12 major cancers

## SUPPLEMENTARY FIGURES AND TABLES

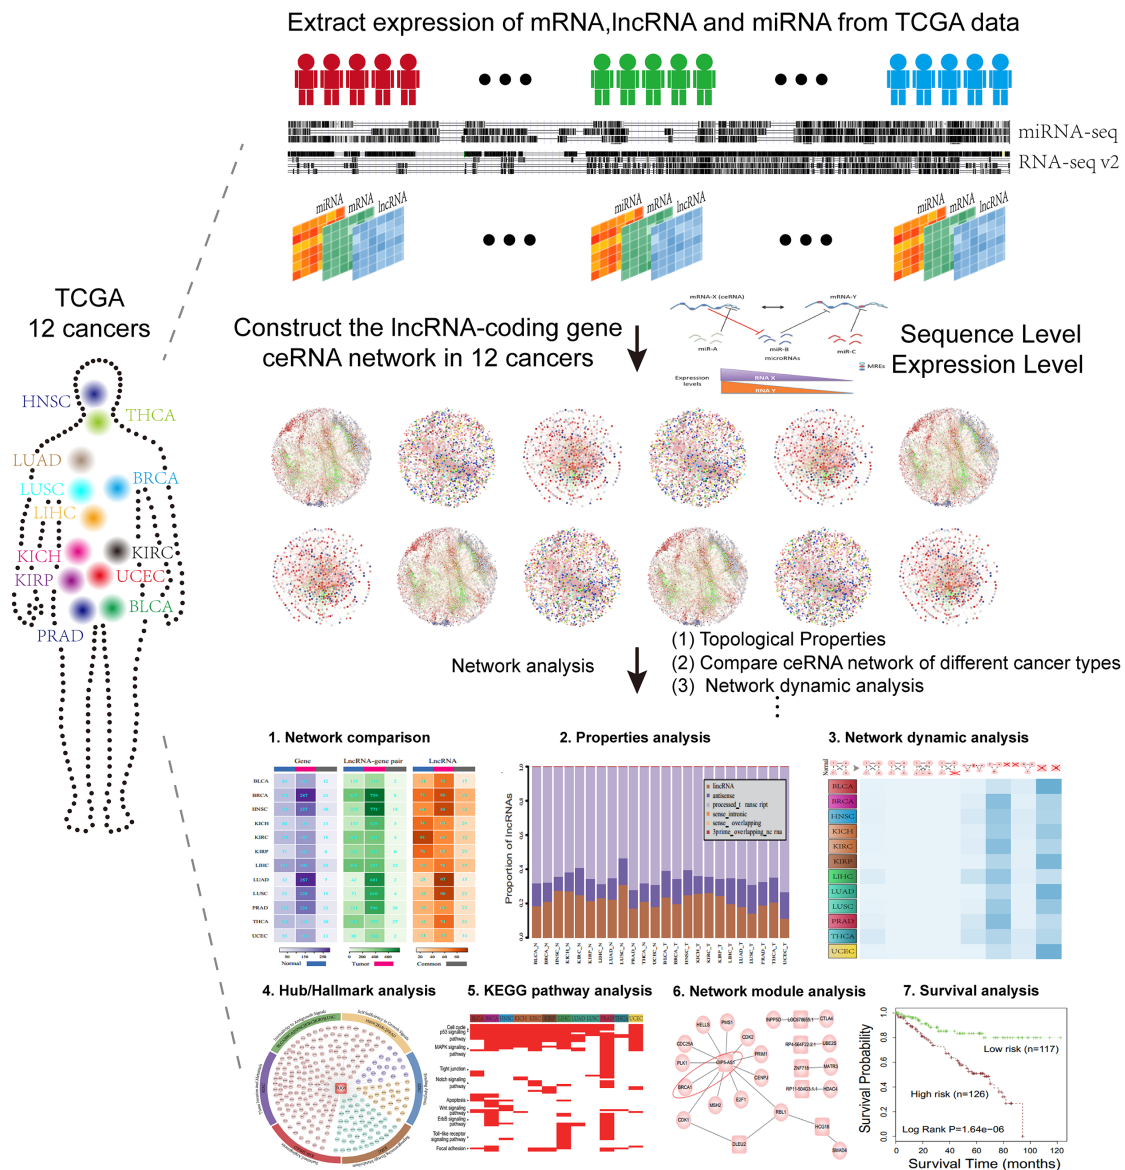

**Supplementary Figure S1: The pipeline for constructing and analyzing the lncRNA related ceRNA networks in each cancer and normal state.** (i) The lncRNA, miRNA and mRNA expression data of more than 5000 samples were extracted from TCGA. (ii) Integrated the interactome data and expression level data to constructed lncRNA related ceRNA networks in pan-cancer. (iii) Comprehensively characterized and analyzed the pan-cancer ceRNA crosstalk.

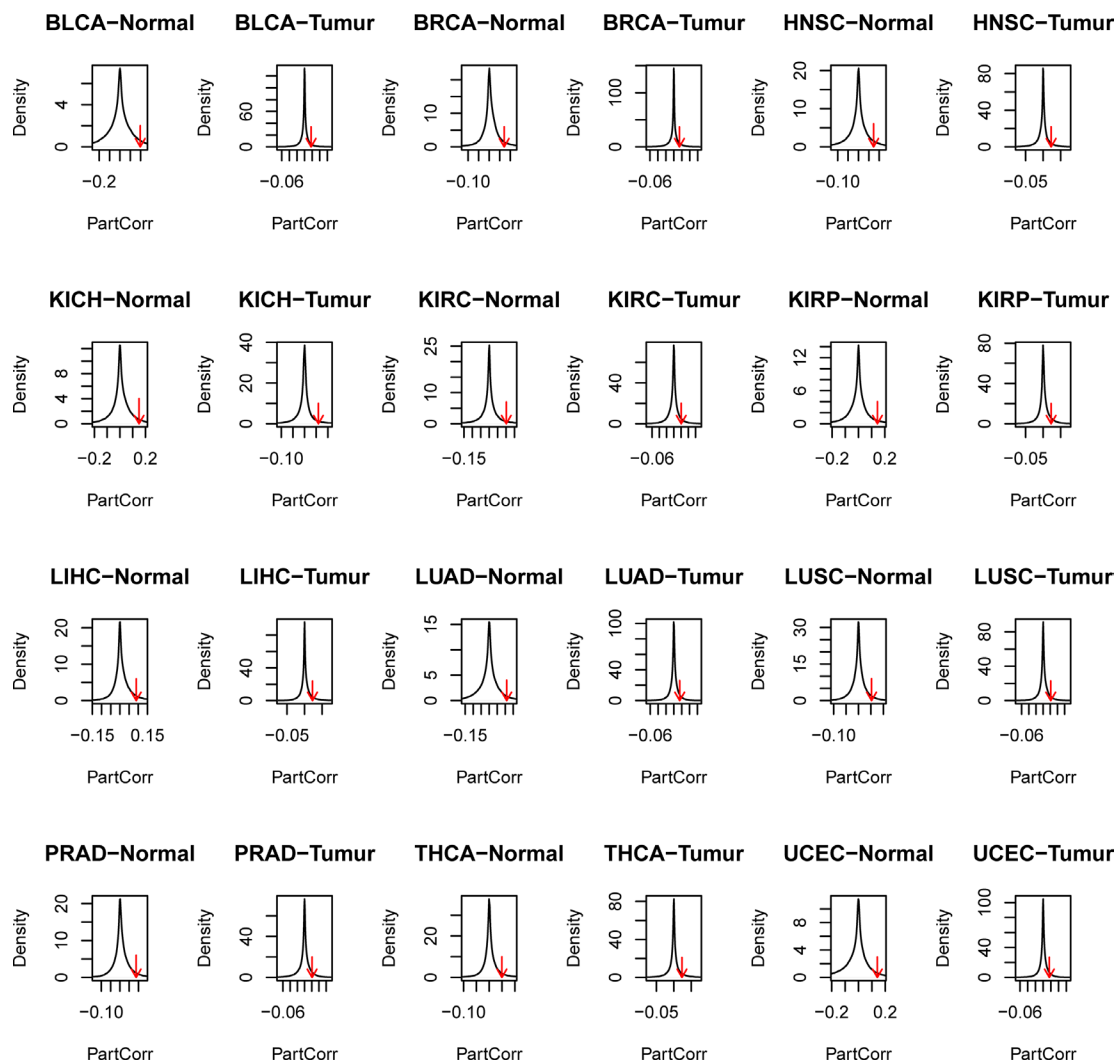

**Supplementary Figure S2: The distribution of sensitivity score for each cancer types.** The top 5% cut-off value of the random distribution were marked by red arrow.

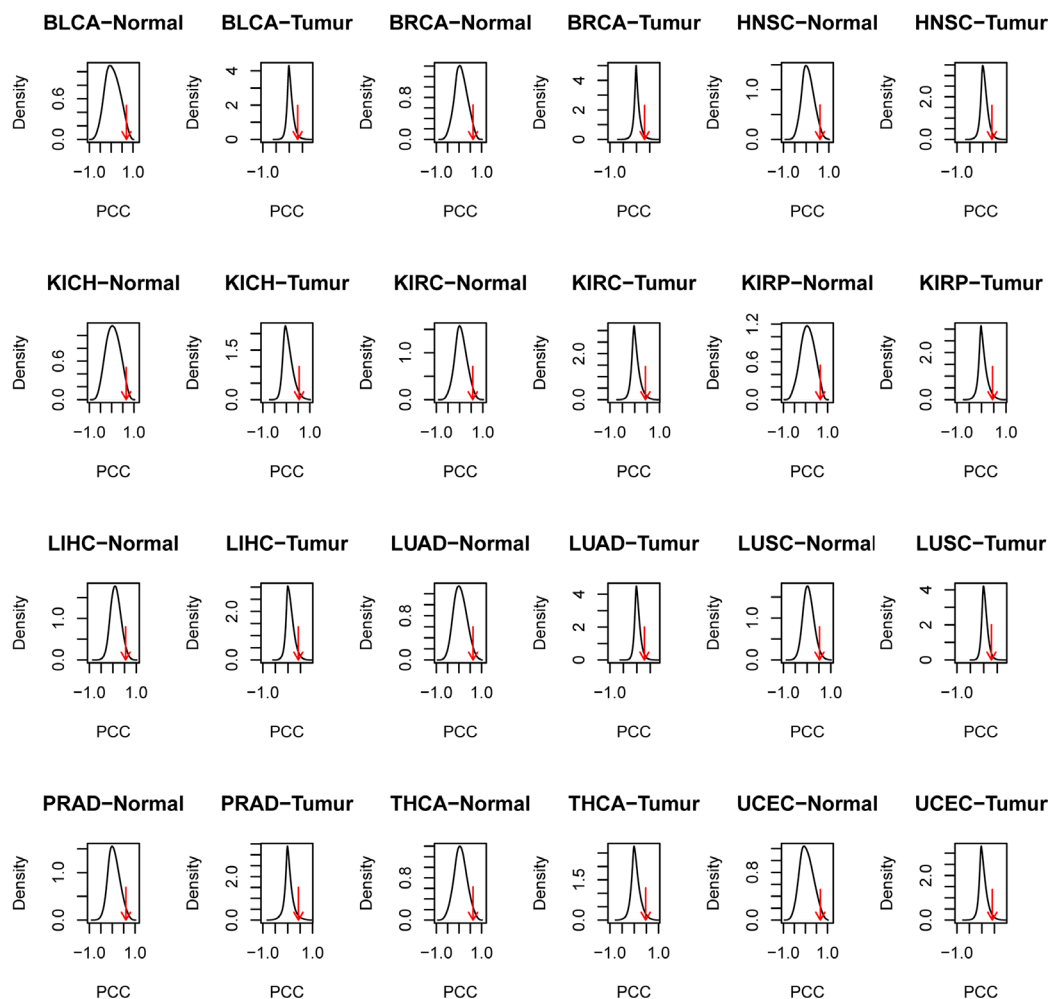

**Supplementary Figure S3: The distribution of Pearson correlation coefficient of lncRNA-mRNA for each cancer types.**  
The top 5% cut-off value of positive correlation were marked by red arrow.

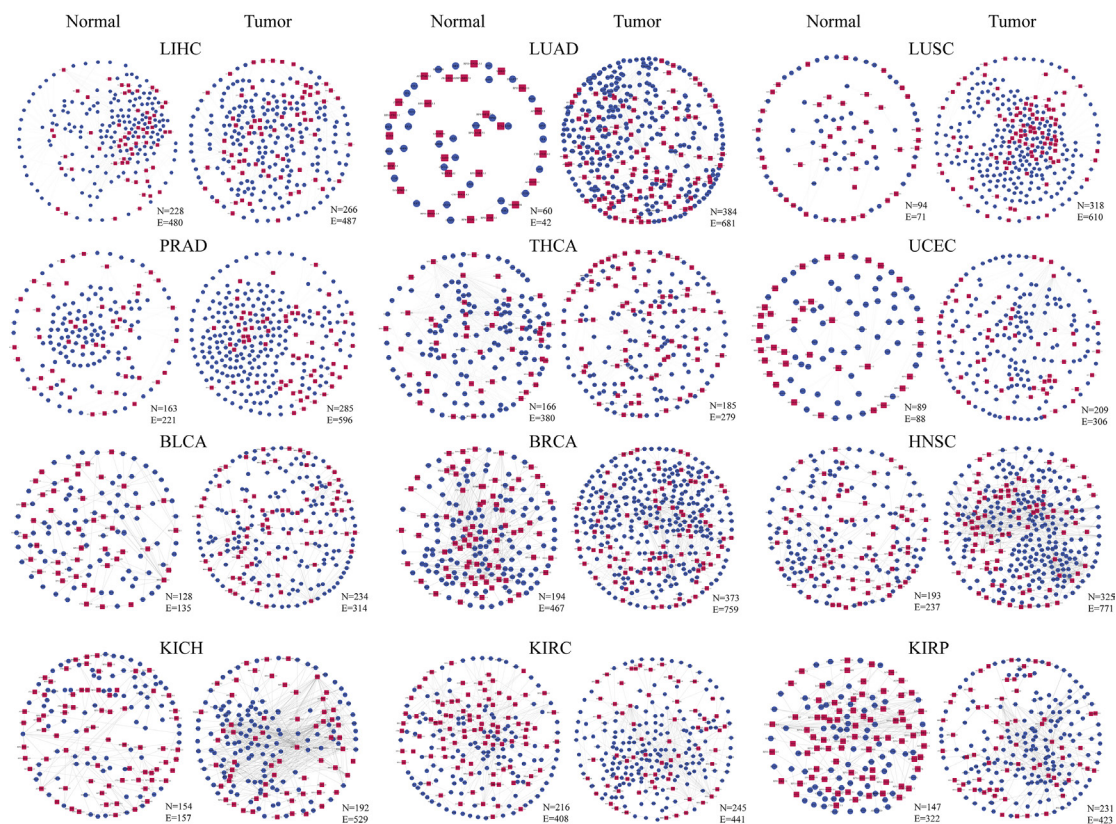

**Supplementary Figure S4: Global landscape of lncRNA related ceRNA networks across 12 cancers.** Blue and circle node represent PCGs, while red and rectangle nodes represent lncRNAs.

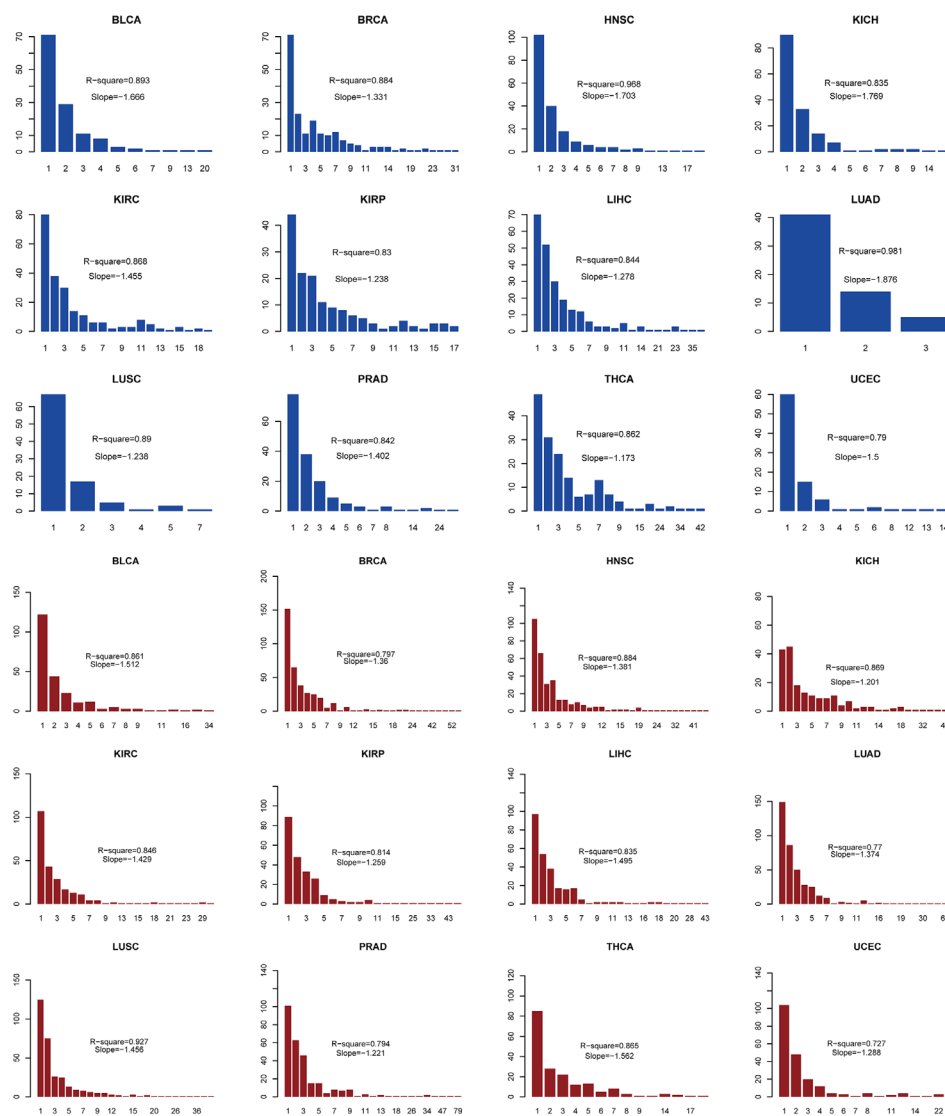

**Supplementary Figure S5: Degree distribution of ceRNA networks.** Blue histograms represent degree distribution of Normal ceRNA networks, while red histograms represent degree distribution of tumor ceRNA networks. The slop (gamma) values of each ceRNA network were shown

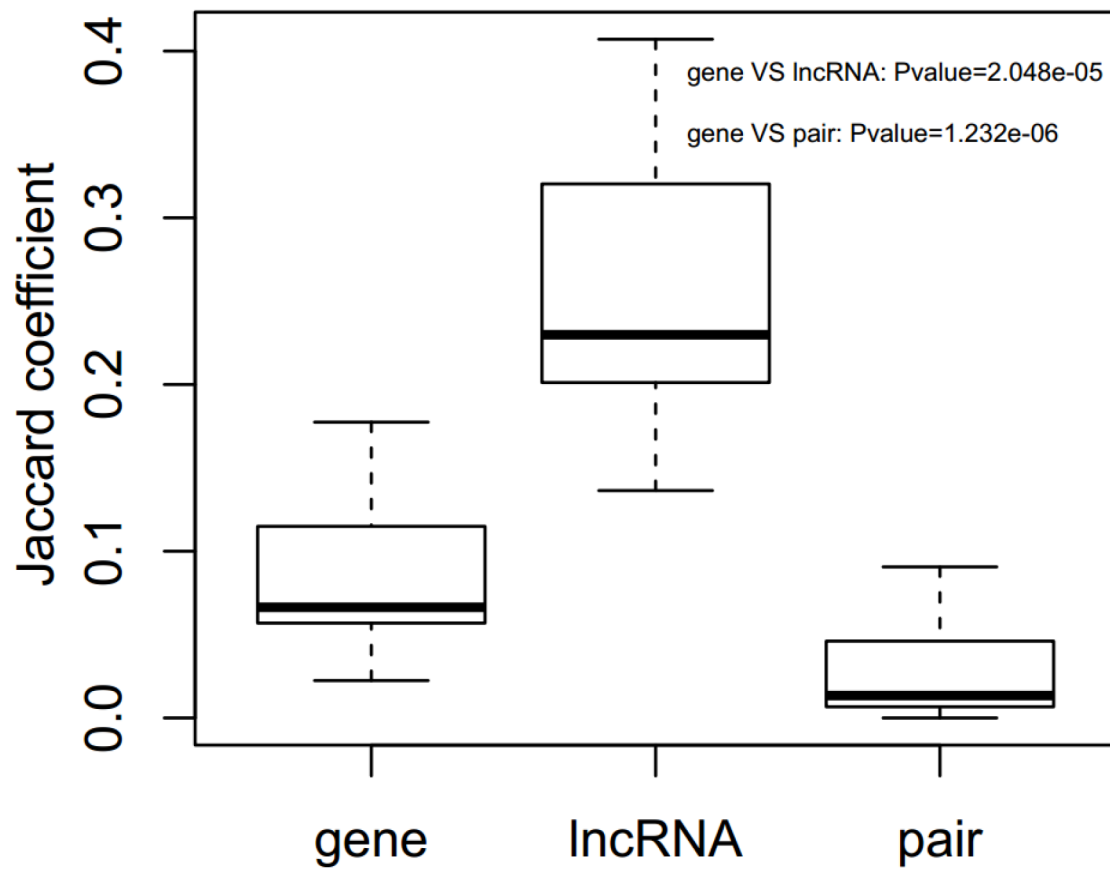

**Supplementary Figure S6: Jaccard coefficient for each cancer type to measure the similarity between normal and tumor ceRNA network at the lncRNA, PCG (gene) and ceRNA pair levels respectively. Significance P-values were calculated by using T test.**

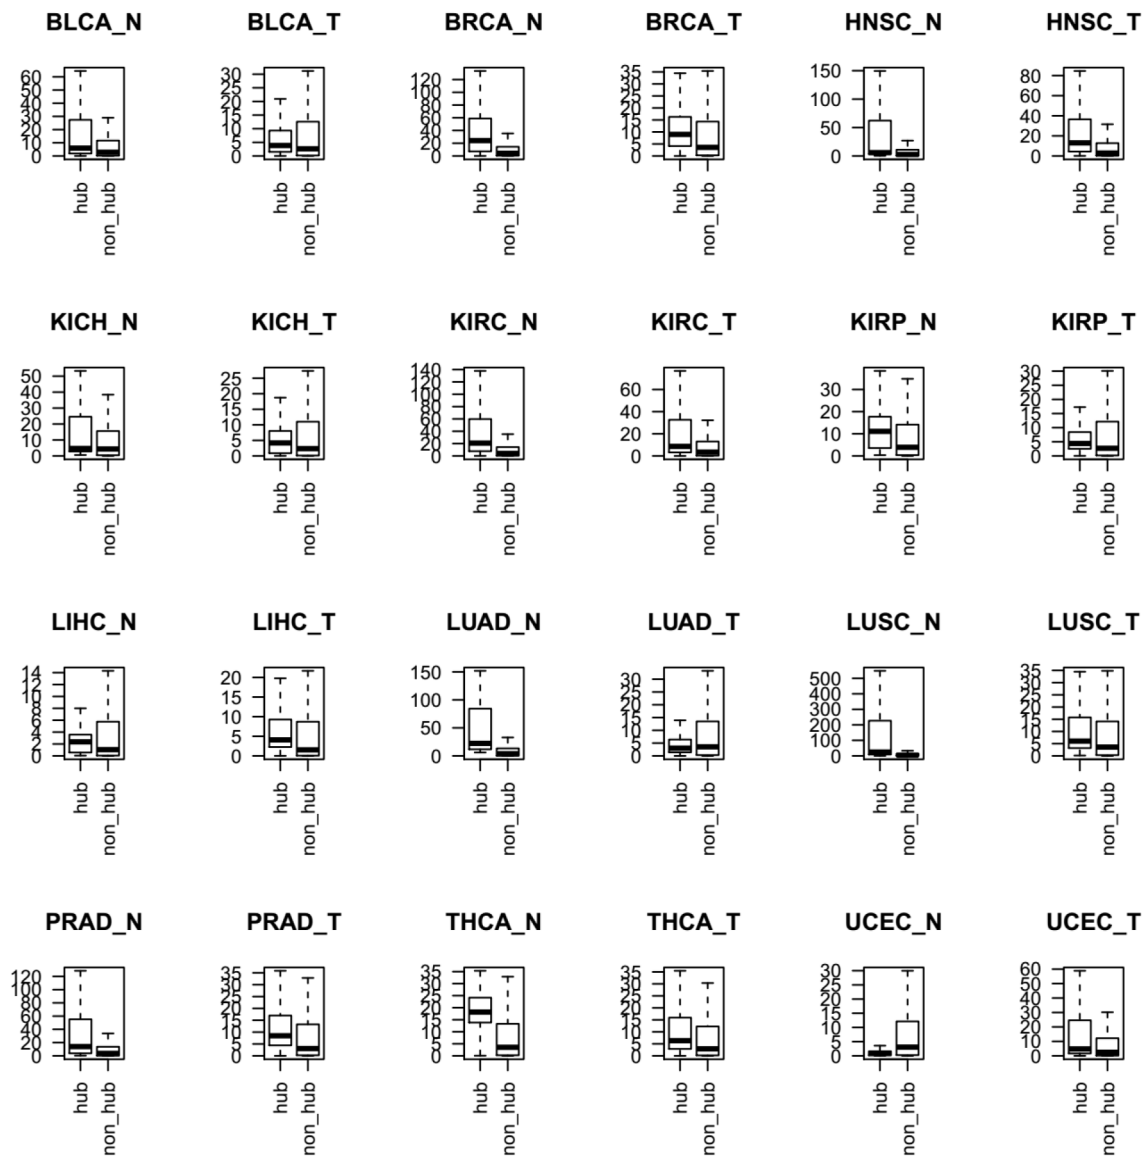

**Supplementary Figure S7: The expression of hub PCGs across pan-cancer ceRNA networks are higher than non-hubs (other PCGs in network).** The ‘\_N’ suffix represent normal ceRNA network, while ‘\_T’ suffix represent tumor ceRNA network.

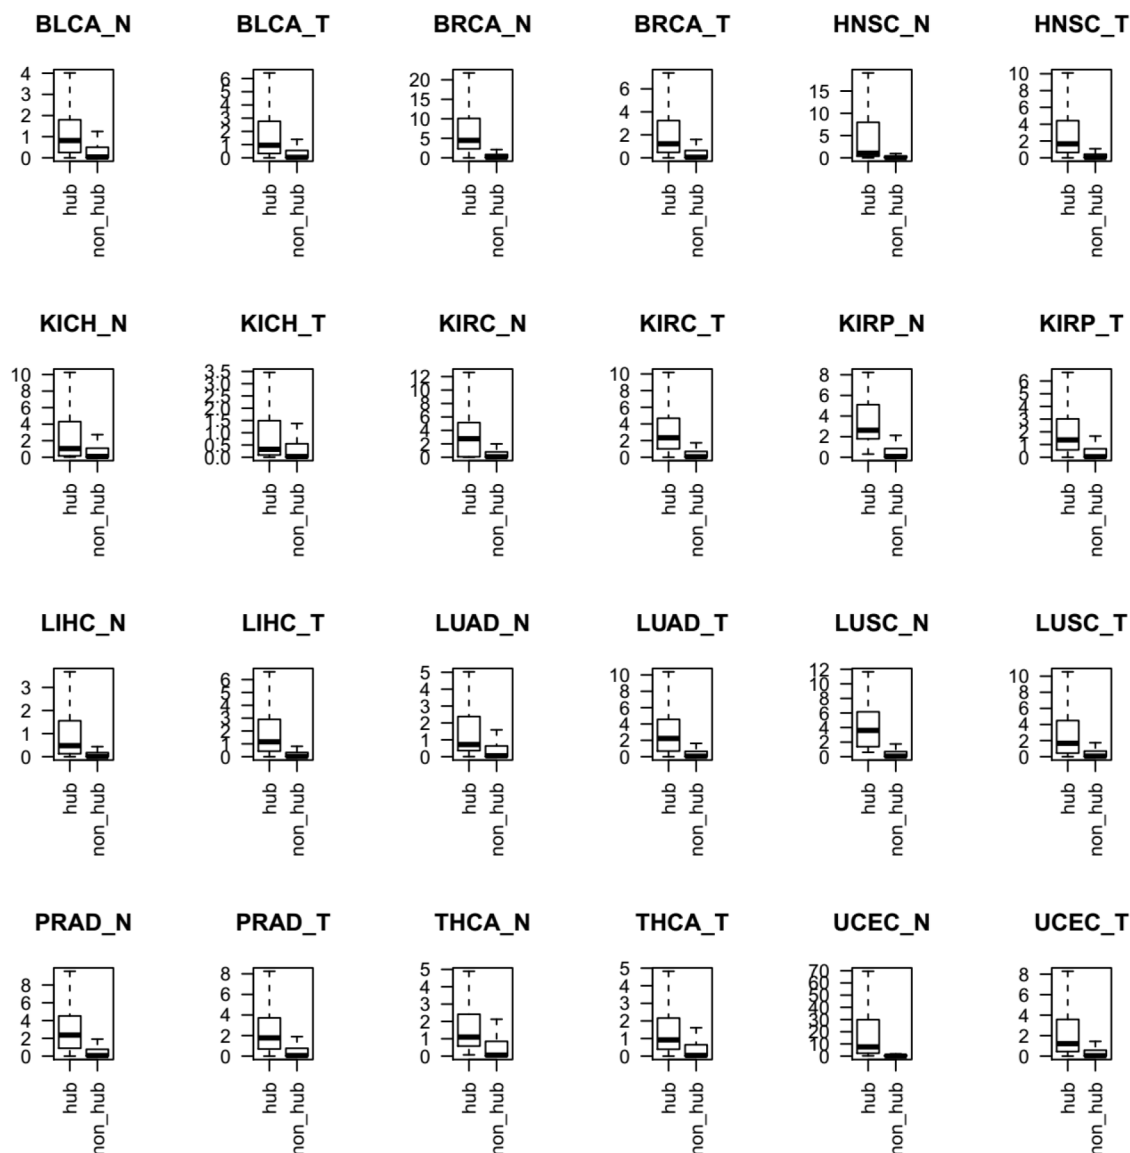

**Supplementary Figure S8: The expression of hub lncRNAs across pan-cancer ceRNA networks are higher than non-hubs (other lncRNAs in network).** The 'N' suffix represent normal ceRNA network, while 'T' suffix represent tumor ceRNA network.

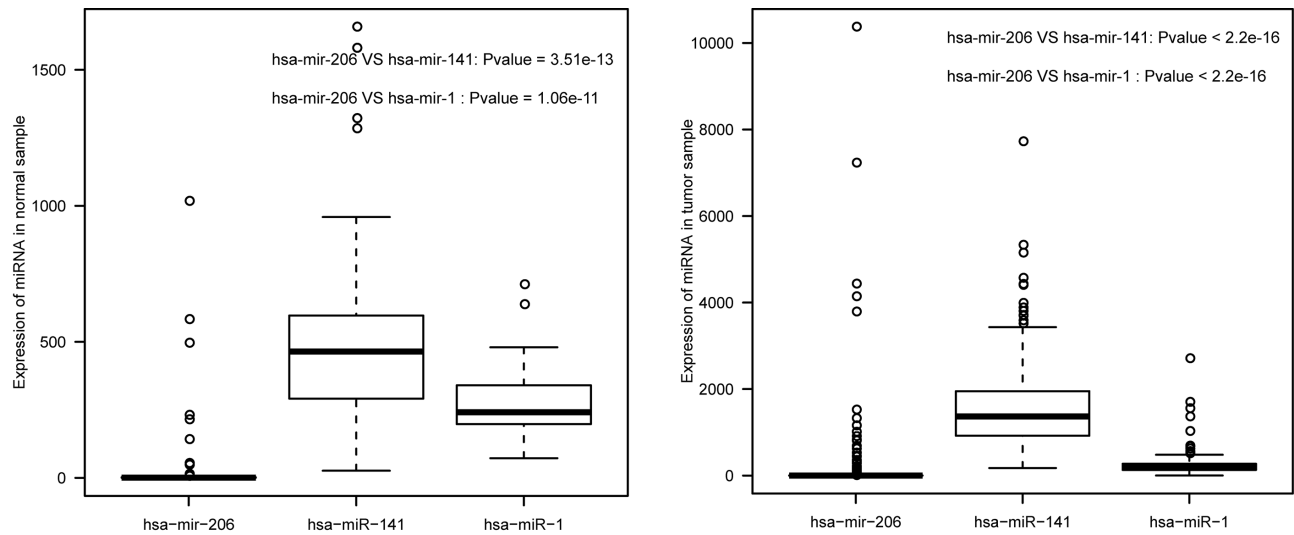

**Supplementary Figure S9: Expression level of miR-206, miR-141 and miR-1 in tumor and normal states of PRAD.** Significance P values were determined by the Mann-Whitney U test.

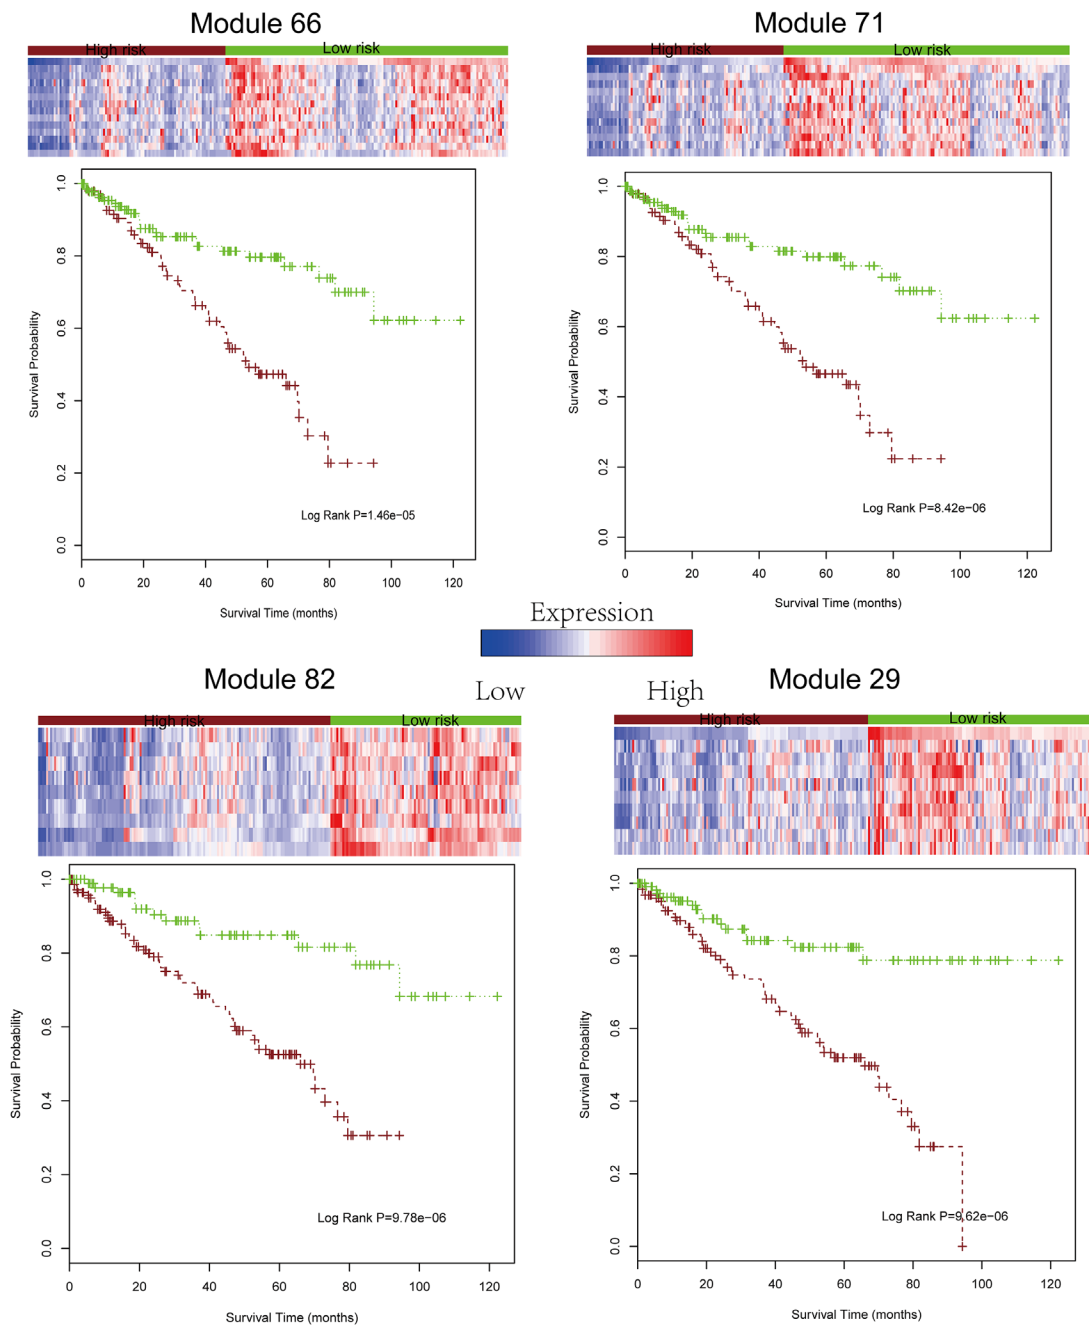

**Supplementary Figure S10: Survival analysis for four ceRNA modules of KIRC.** The significance of clinical outcome difference between the low-risk and high-risk groups was estimated by K-M survival analysis. P-values were calculated by the log-rank test.

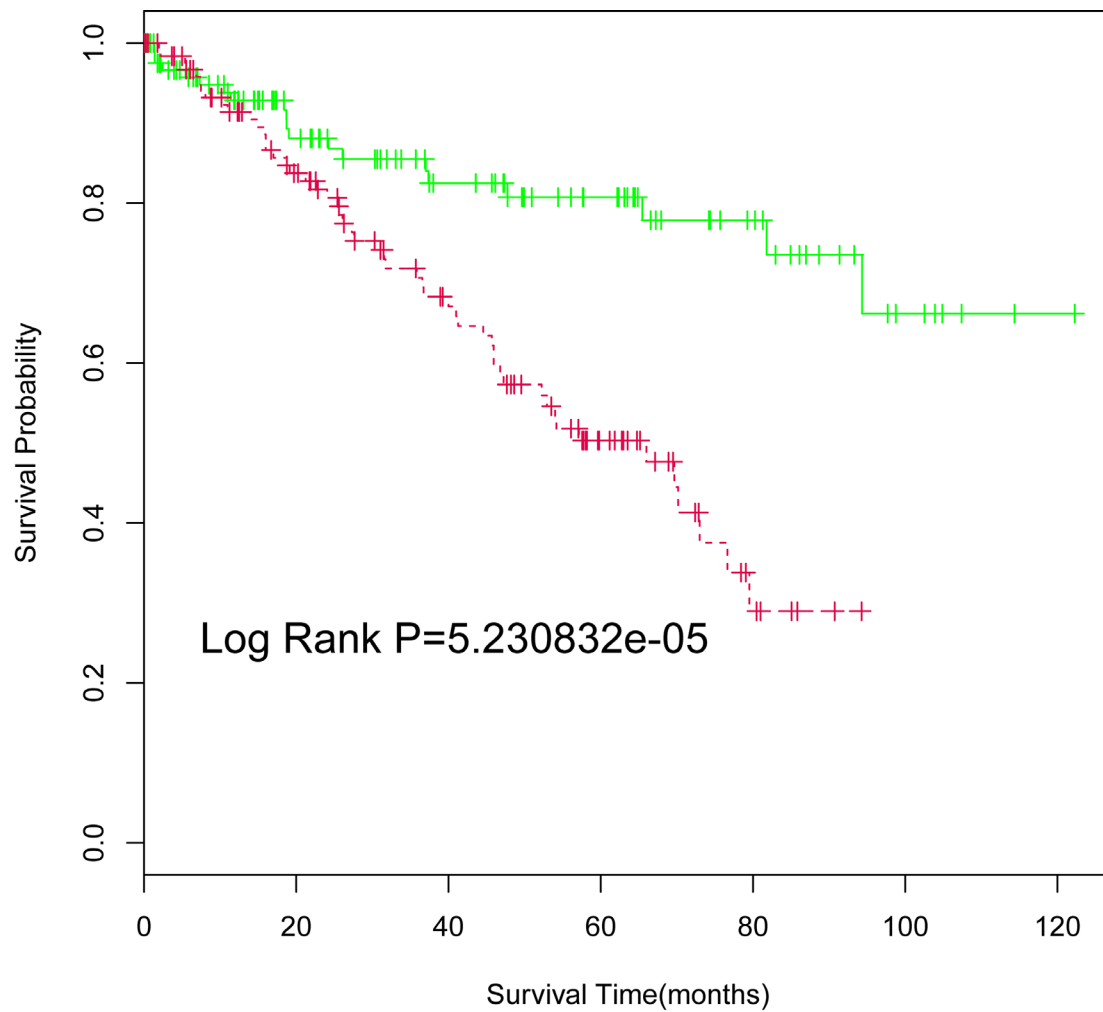

**Supplementary Figure S11:** Kaplan-Meier survival analysis of two groups of patients that reclassified by using the median value of risk score with different clinical outcomes.

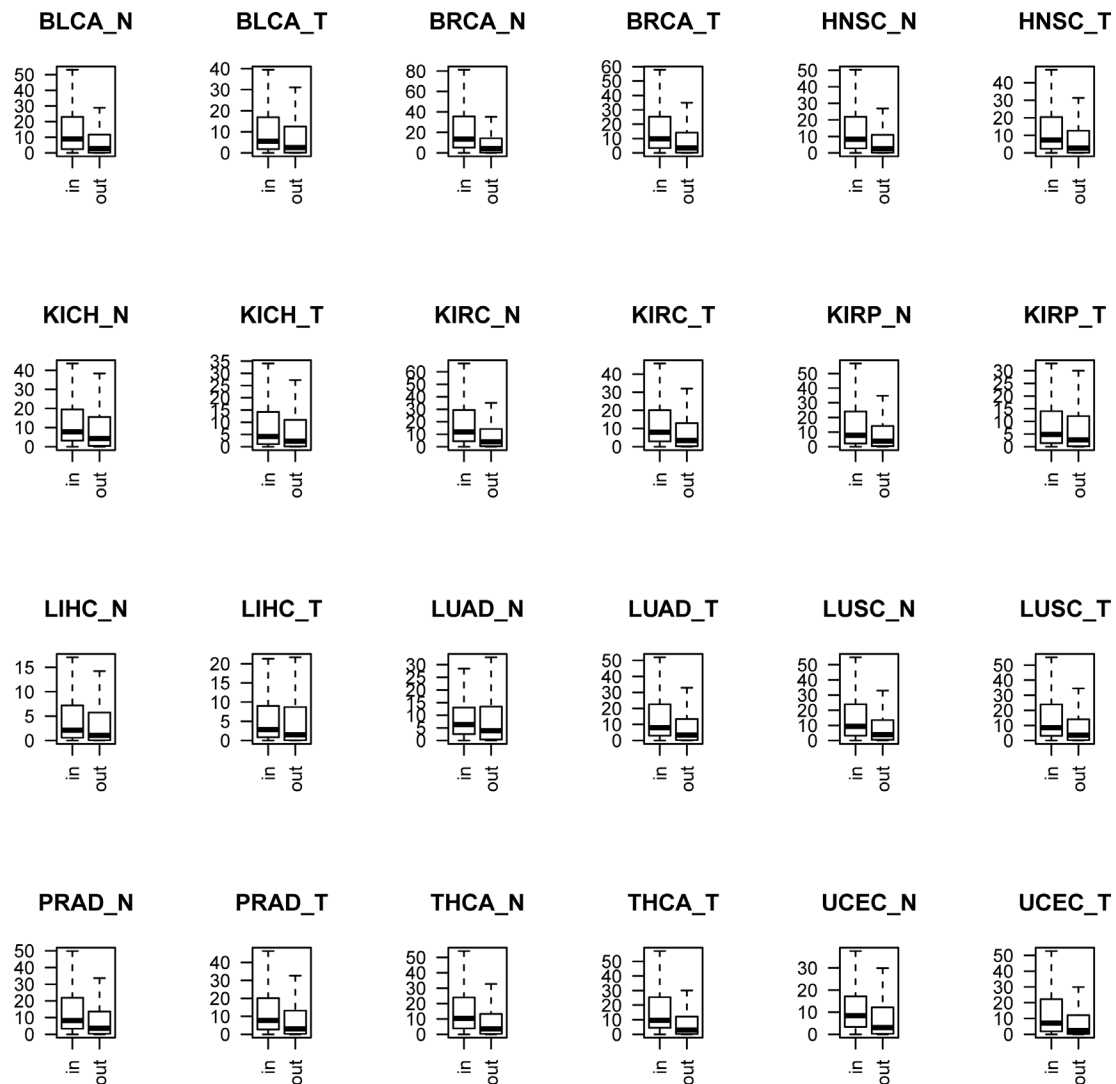

**Supplementary Figure S12: The expression of PCGs in pan-cancer ceRNA networks are higher than other PCGs.**  
 The '\_N' suffix represent normal ceRNA network, while '\_T' suffix represent tumor ceRNA network.

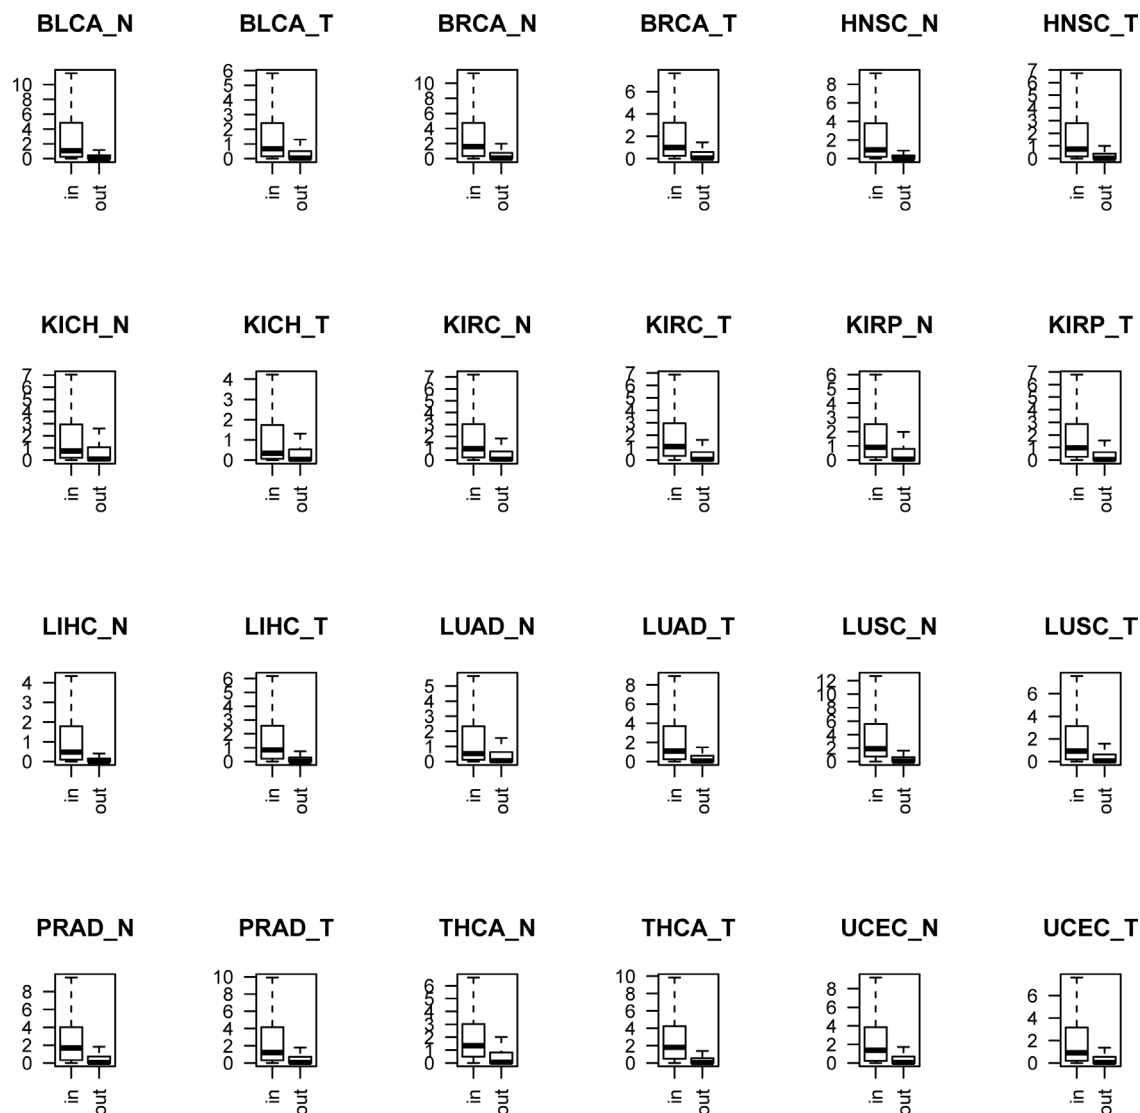

**Supplementary Figure S13: The expression of lncRNAs in pan-cancer ceRNA networks are higher than other lncRNAs.** The '\_N' suffix represent normal ceRNA network, while '\_T' suffix represent tumor ceRNA network.

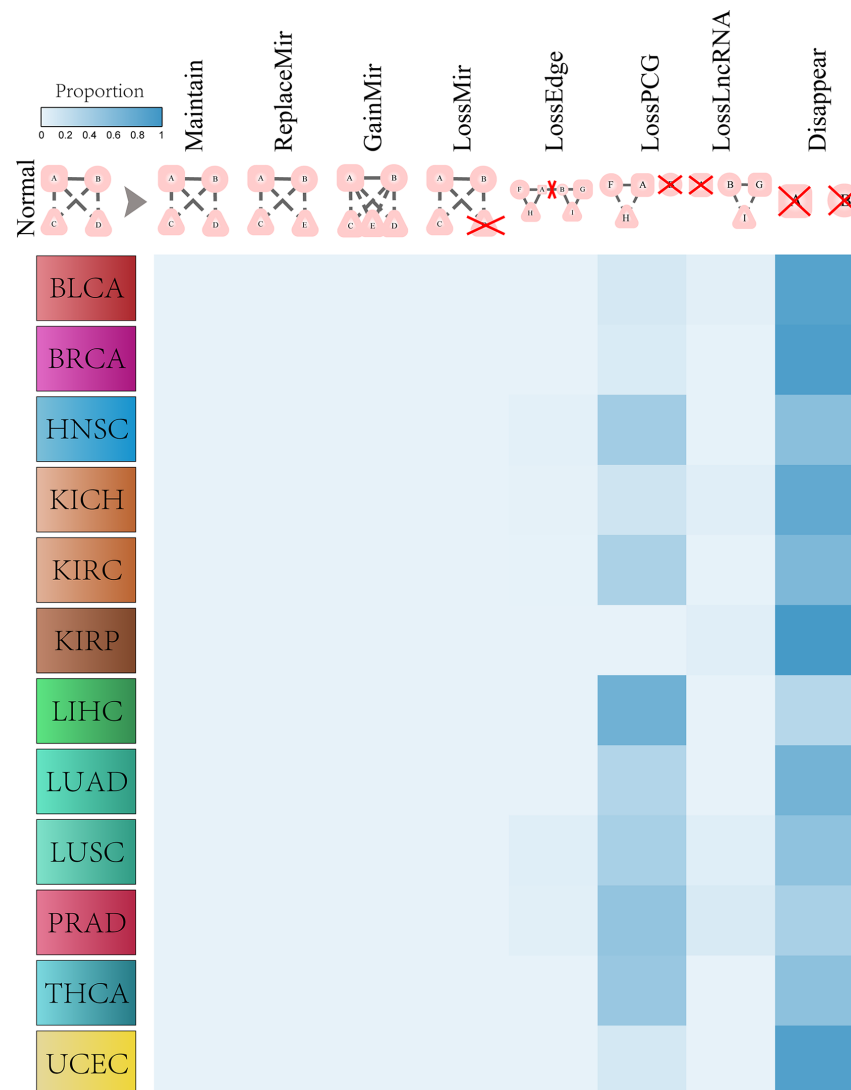

**Supplementary Figure S14: The dynamic ceRNA interactions in normal and tumor states of pan-cancer.** The ceRNA networks were constructed based on normal-matched samples for each cancer type.

Supplementary Table S1: Detailed sample information of 12 cancers

| Tumor Type | Tumor Full Name                       | Tumor Samples | Normal Samples | Normal-matched samples |
|------------|---------------------------------------|---------------|----------------|------------------------|
| BLCA       | Bladder Urothelial Carcinoma          | 405           | 19             | 19                     |
| BRCA       | Breast invasive carcinoma             | 758           | 87             | 86                     |
| KIRP       | Kidney renal papillary cell carcinoma | 291           | 32             | 32                     |
| LUAD       | Lung adenocarcinoma                   | 445           | 19             | 12                     |
| LUSC       | Lung squamous cell carcinoma          | 342           | 38             | 38                     |
| UCEC       | Uterine Corpus Endometrioid Carcinoma | 172           | 23             | 7                      |
| HNSC       | Head and Neck squamous cell carcinoma | 474           | 43             | 41                     |
| KICH       | Kidney Chromophobe                    | 66            | 25             | 25                     |
| KIRC       | Kidney renal clear cell carcinoma     | 255           | 71             | 68                     |
| LIHC       | Liver hepatocellular carcinoma        | 350           | 50             | 49                     |
| PRAD       | Prostate adenocarcinoma               | 494           | 52             | 52                     |
| THCA       | Thyroid carcinoma                     | 463           | 53             | 51                     |

**Supplementary Table S2: The minimum threshold value of S that top 5% correspond to for each ceRNA networks**

| Cancer Type | S (Normal) | S (Tumor) |
|-------------|------------|-----------|
| BLCA        | 0.20       | 0.02      |
| BRCA        | 0.07       | 0.02      |
| HNSC        | 0.07       | 0.022     |
| KICH        | 0.15       | 0.06      |
| KIRC        | 0.10       | 0.02      |
| KIRP        | 0.14       | 0.02      |
| LIHC        | 0.09       | 0.02      |
| LUAD        | 0.11       | 0.015     |
| LUSC        | 0.05       | 0.02      |
| PRAD        | 0.09       | 0.02      |
| THCA        | 0.05       | 0.02      |
| UCEC        | 0.14       | 0.02      |

**Supplementary Table S3: The minimum Pearson correlation coefficient, maximum P-value and FDR for significant ceRNA pairs in each ceRNA network**

| Cancer Type | Normal |          |          | Tumor |          |          |
|-------------|--------|----------|----------|-------|----------|----------|
|             | PCC    | P-value  | FDR      | PCC   | P-value  | FDR      |
| BLCA        | 0.70   | 0.00049  | 0.015    | 0.32  | 4.60E-11 | 1.50E-09 |
| BRCA        | 0.62   | 2.09E-11 | 6.40E-10 | 0.30  | 6.08E-18 | 1.83E-16 |
| HNSC        | 0.61   | 6.71E-06 | 0.00022  | 0.35  | 1.99E-15 | 5.68E-14 |
| KICH        | 0.65   | 0.000278 | 0.0085   | 0.54  | 1.41E-06 | 4.78E-05 |
| KIRC        | 0.57   | 1.15E-07 | 3.38E-06 | 0.43  | 2.46E-13 | 8.58E-12 |
| KIRP        | 0.67   | 1.34E-05 | 0.00039  | 0.45  | 1.72E-16 | 5.58E-15 |
| LIHC        | 0.55   | 2.55E-05 | 0.00071  | 0.41  | 2.15E-16 | 6.22E-15 |
| LUAD        | 0.63   | 0.0033   | 0.11     | 0.28  | 1.18E-09 | 3.93E-08 |
| LUSC        | 0.53   | 0.00055  | 0.017    | 0.28  | 8.44E-08 | 2.72E-06 |
| PRAD        | 0.60   | 1.29E-06 | 4.10E-05 | 0.43  | 8.86E-25 | 2.39E-23 |
| THCA        | 0.62   | 2.48E-07 | 7.06E-06 | 0.47  | 2.98E-28 | 8.80E-27 |
| UCEC        | 0.68   | 0.00022  | 0.0074   | 0.42  | 8.33E-09 | 2.73E-07 |

Note: PCC: minimum Pearson correlation coefficient; P-value: maximum Fisher's asymptotic p-value; FDR: maximum corrected P-value.

**Supplementary Table S4: Comparison of ceRNA network between tumor and normal states of each cancer type**

| Cancer Type | Pair normal | Pair tumor | Pair intersect | Triplets intersect |
|-------------|-------------|------------|----------------|--------------------|
| BLCA        | 135         | 314        | 2              | 2                  |
| BRCA        | 467         | 759        | 8              | 3                  |
| HNSC        | 237         | 771        | 18             | 10                 |
| KICH        | 157         | 529        | 5              | 5                  |
| KIRC        | 408         | 441        | 4              | 3                  |
| KIRP        | 322         | 423        | 0              | 0                  |
| LIHC        | 480         | 487        | 32             | 31                 |
| LUAD        | 42          | 681        | 2              | 1                  |
| LUSC        | 71          | 610        | 4              | 3                  |
| PRAD        | 221         | 596        | 20             | 11                 |
| THCA        | 380         | 279        | 27             | 26                 |
| UCEC        | 88          | 306        | 2              | 2                  |

Note: Pair normal (tumor) represents the number of lncRNA-mRNA ceRNA pairs in each network; Pair (Triplets) intersect represents the number of shared lncRNA-mRNA pairs (lncRNA-miRNA-mRNA triplets) between normal and tumor network for each cancer type.

**Supplementary Table S5: Jaccard coefficient of competing triplets between tumors with similar tissue origin**

| Cancer pair      | Pair Jcard | Triplets intersect | Triplets Jcard |
|------------------|------------|--------------------|----------------|
| KIRC-KIRP_Normal | 0.11       | 73                 | 0.11           |
| KIRC-KICH_Normal | 0.06       | 32                 | 0.06           |
| KIRP-KICH_Normal | 0.04       | 17                 | 0.04           |
| LUAD-LUSC_Tumor  | 0.08       | 103                | 0.07           |

Note: 'Pair (Triplets) Jcard' represents the Jaccard coefficient of lncRNA-mRNA pairs (lncRNA-miRNA-mRNA triplets) for the two corresponding networks. 'Triplets intersect' represents the shared number of lncRNA-miRNA-mRNA triplets for the two corresponding networks.

**Supplementary Table S6: The minimal degree value of hub nodes for each ceRNA network**

|      | Minimal degree of hub nodes (normal) | Minimal degree of hub nodes (tumor) |
|------|--------------------------------------|-------------------------------------|
| BLCA | 4                                    | 7                                   |
| BRCA | 12                                   | 10                                  |
| HNSC | 6                                    | 12                                  |
| KICH | 4                                    | 14                                  |
| KIRC | 11                                   | 8                                   |
| KIRP | 12                                   | 8                                   |
| LIHC | 9                                    | 7                                   |
| LUAD | 3                                    | 7                                   |
| LUSC | 3                                    | 11                                  |
| PRAD | 6                                    | 9                                   |
| THCA | 8                                    | 7                                   |
| UCEC | 4                                    | 7                                   |

Supplementary Table S7: Comparison of ceRNA networks constructed based on normal-matched samples

| Cancer Type | PCG    |       |        | LncRNA-PCG pair |       |        | LncRNA |       |        |
|-------------|--------|-------|--------|-----------------|-------|--------|--------|-------|--------|
|             | Normal | Tumor | common | Normal          | Tumor | common | Normal | Tumor | common |
| BLCA        | 23     | 21    | 1      | 27              | 65    | 0      | 11     | 32    | 3      |
| BRCA        | 14     | 76    | 1      | 17              | 108   | 0      | 6      | 49    | 4      |
| HNSC        | 24     | 65    | 2      | 35              | 110   | 0      | 23     | 35    | 11     |
| KICH        | 21     | 81    | 5      | 23              | 181   | 0      | 16     | 40    | 8      |
| KIRC        | 31     | 119   | 2      | 40              | 363   | 0      | 19     | 28    | 5      |
| KIRP        | 14     | 53    | 2      | 16              | 71    | 0      | 10     | 23    | 0      |
| LIHC        | 53     | 43    | 0      | 73              | 65    | 0      | 22     | 21    | 11     |
| LUAD        | 23     | 14    | 0      | 27              | 16    | 0      | 15     | 11    | 2      |
| LUSC        | 59     | 26    | 2      | 123             | 40    | 0      | 47     | 25    | 11     |
| PRAD        | 37     | 33    | 2      | 60              | 54    | 0      | 24     | 27    | 10     |
| THCA        | 13     | 40    | 0      | 25              | 73    | 0      | 11     | 18    | 4      |
| UCEC        | 10     | 8     | 0      | 11              | 9     | 0      | 5      | 8     | 1      |
